# Supplementary material
Source: PeerJ journal article supplement (doi:10.7717/peerj-cs.3498)

Screens:


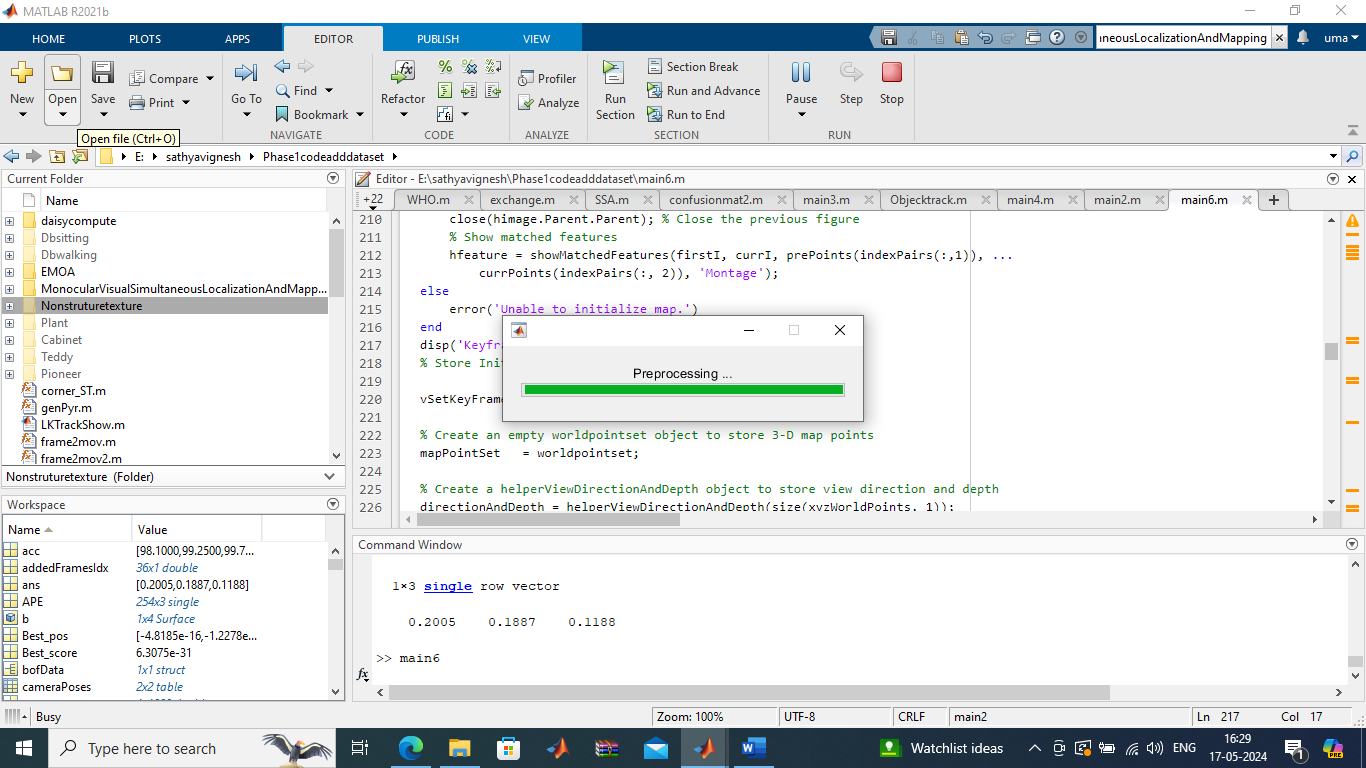


Optimization MFO:


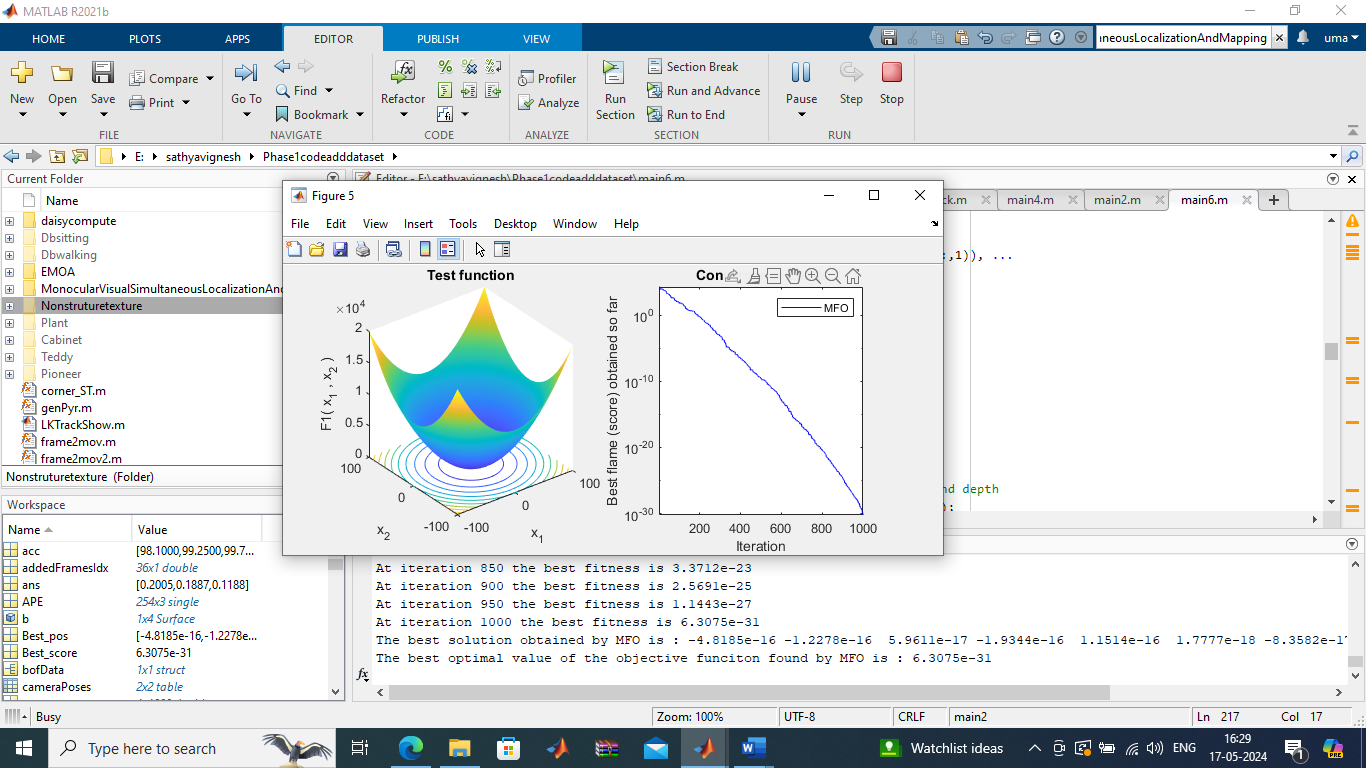


**Map from frme 1 to N**


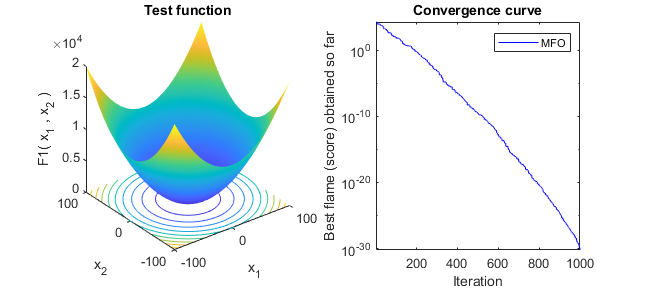


**Pioneer Dataset:**

**Map from frme 1 to N**

**Initial Key frame Features:**

**Map points and camera trajectory:**


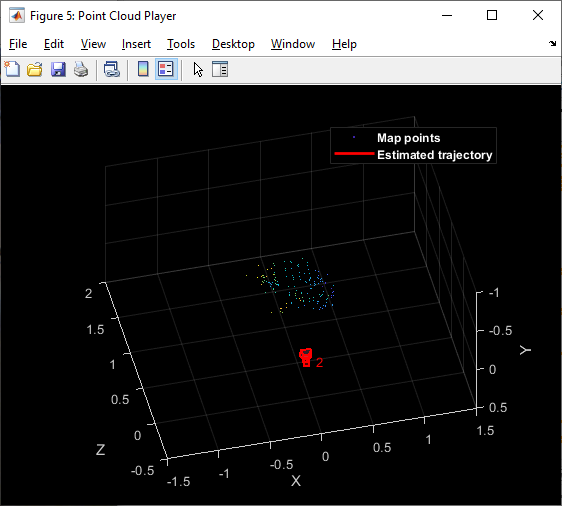


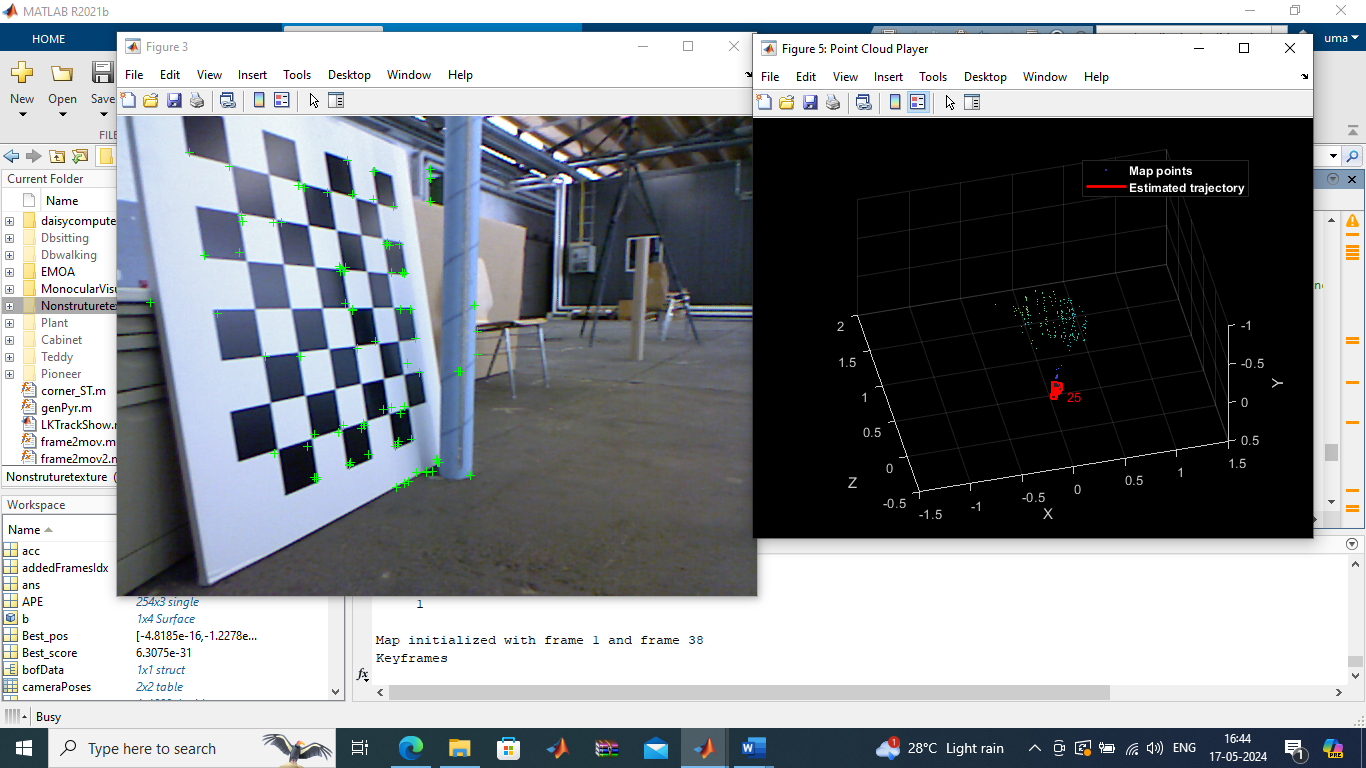

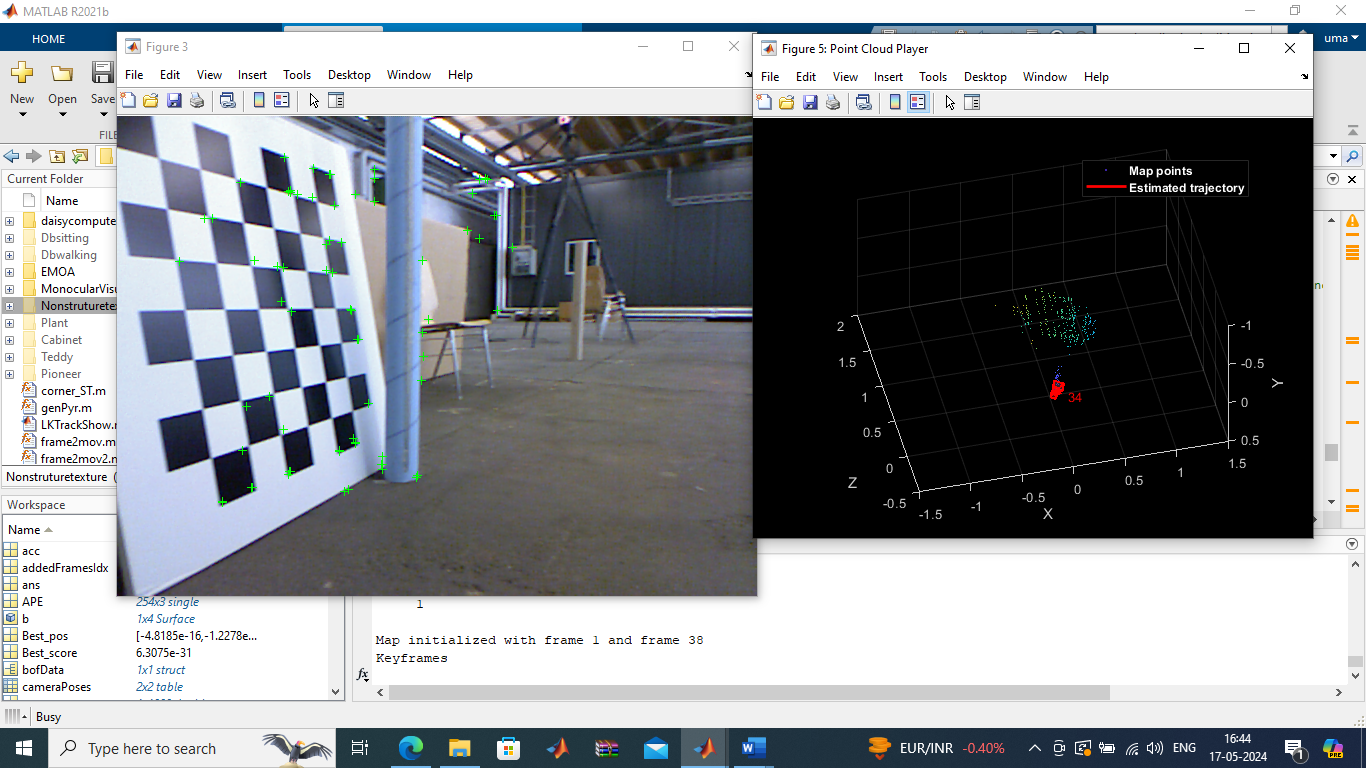


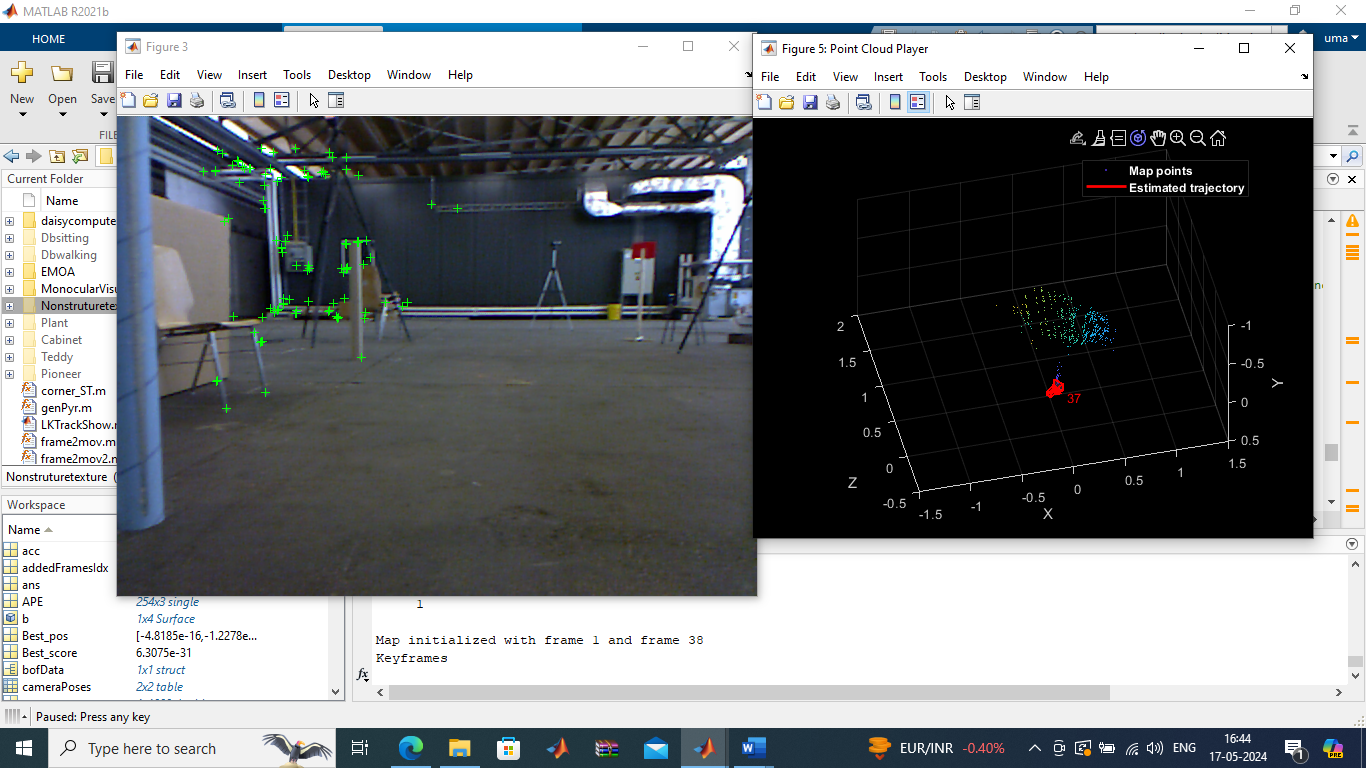


**Evaluate tracking accuracy:**


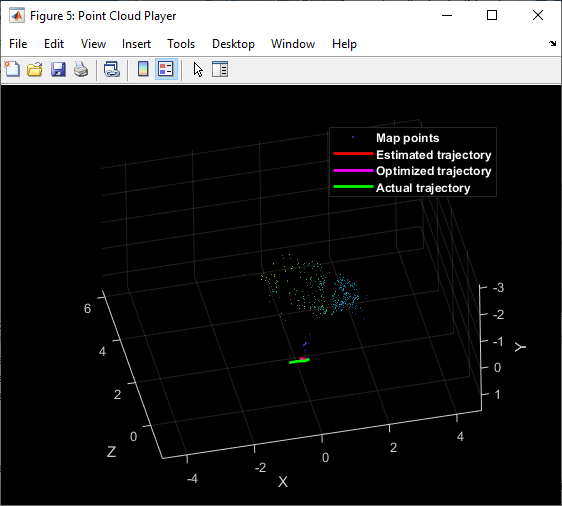


Sitting Dataset:


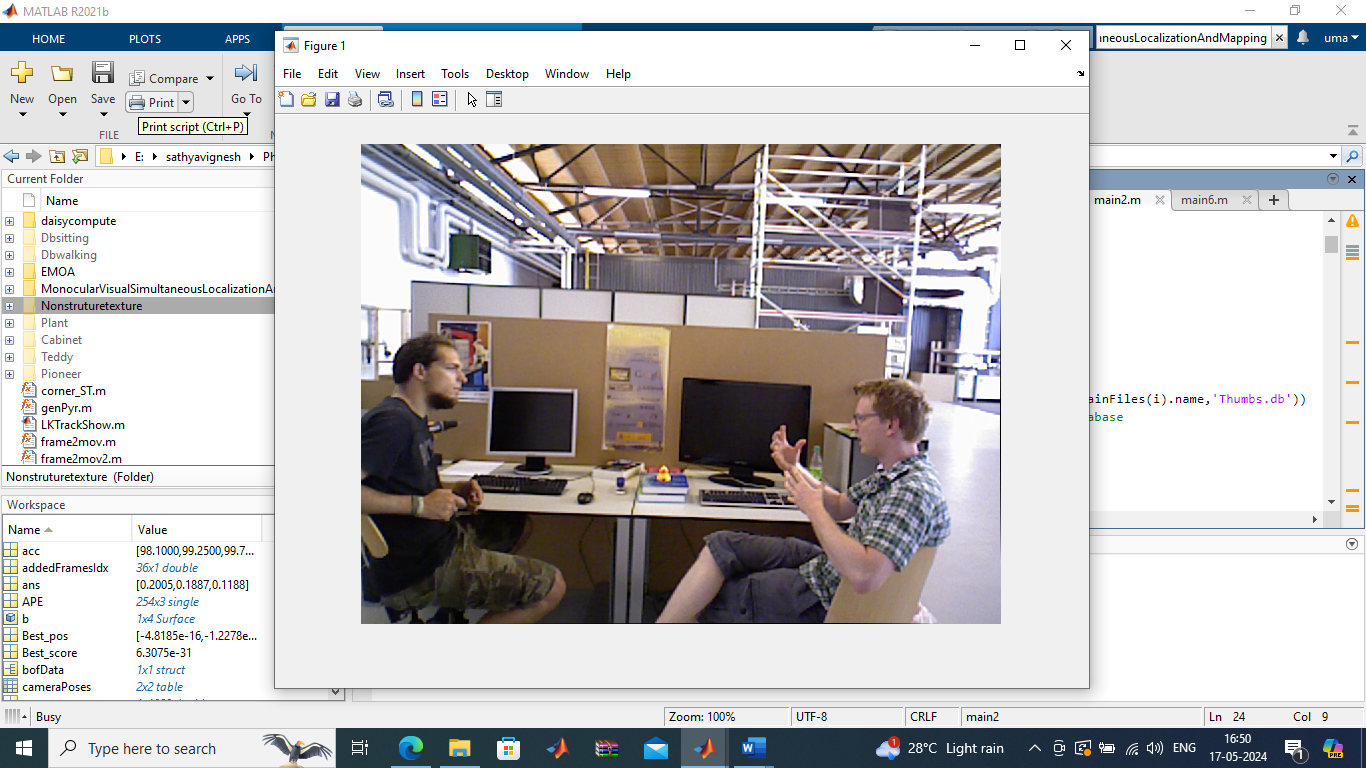


**Map from frme 1 to N**

**Initial Key frame Features:**


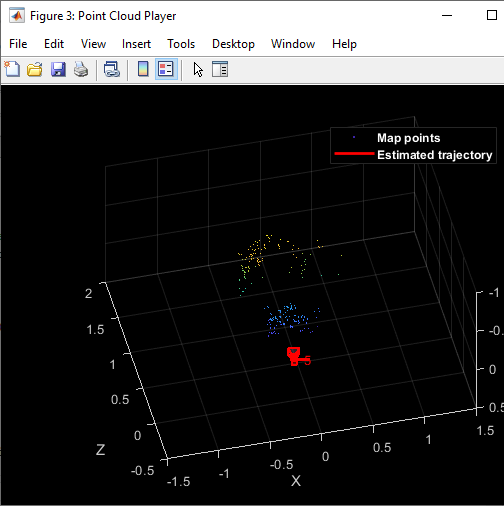


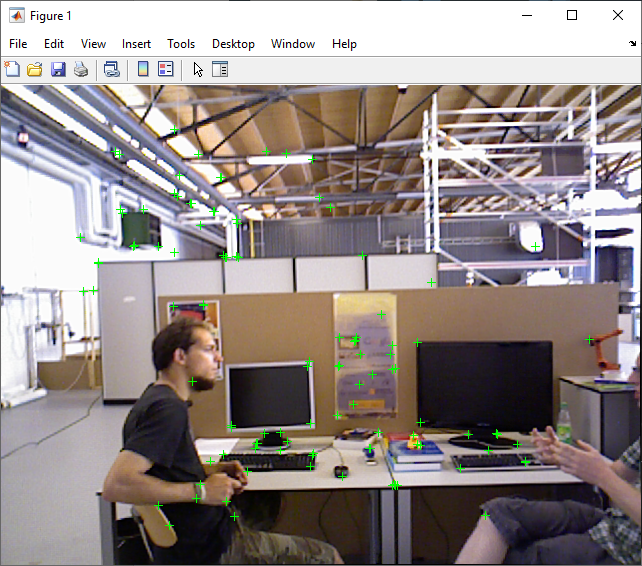


**Initial Key frame Features:**


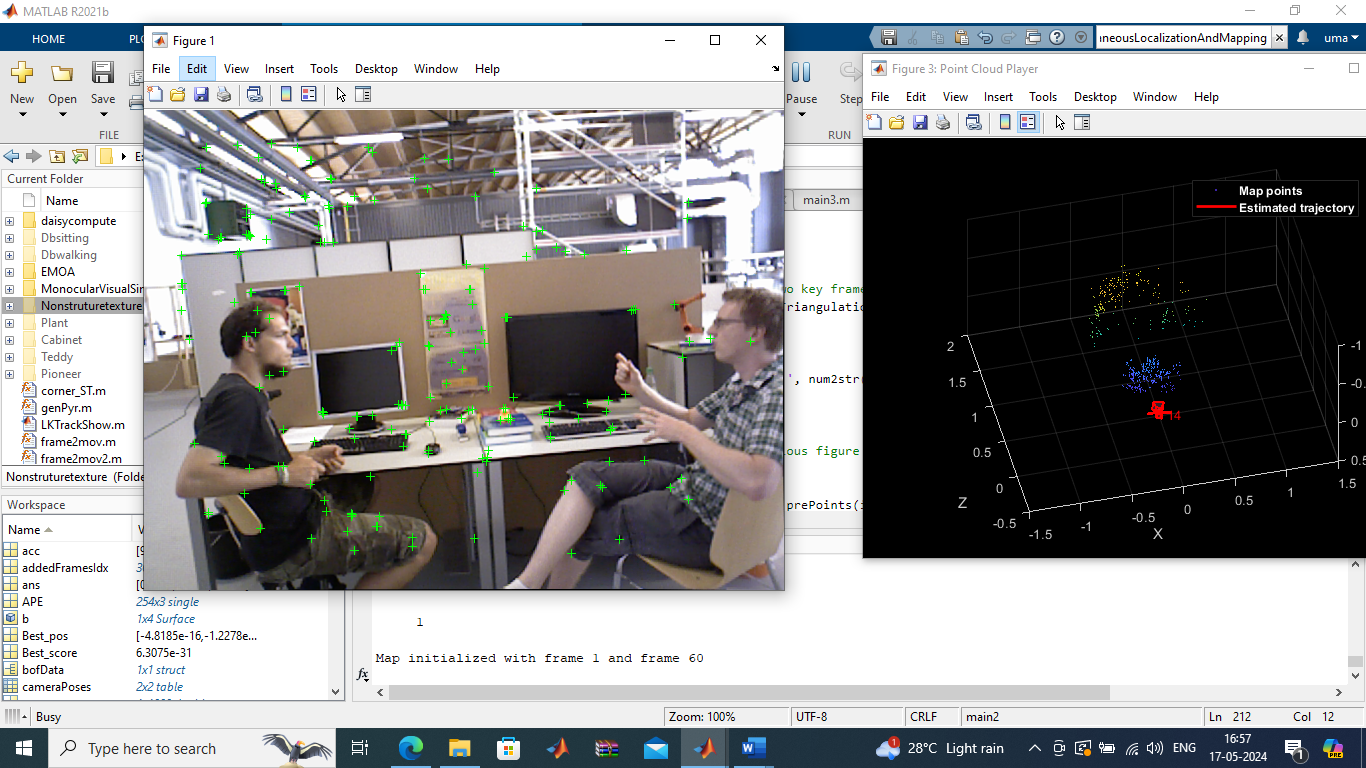


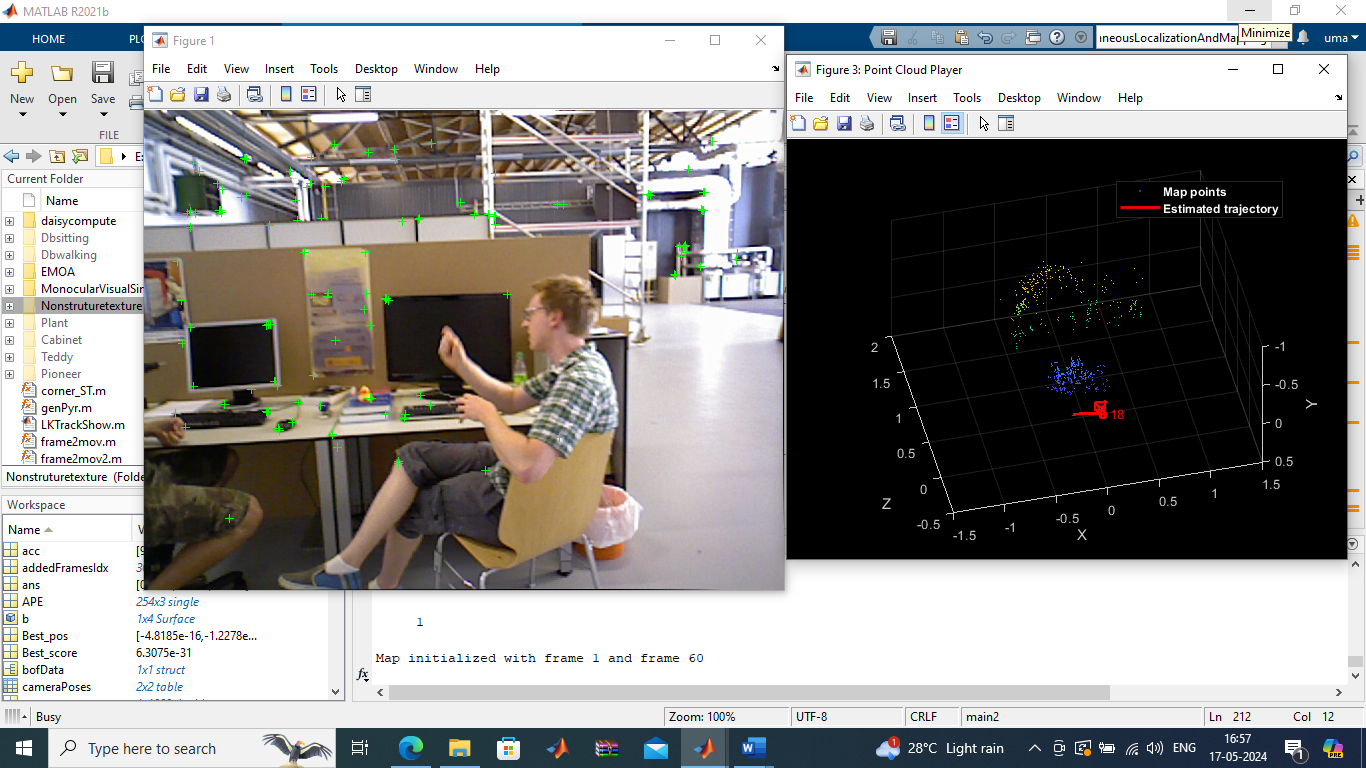


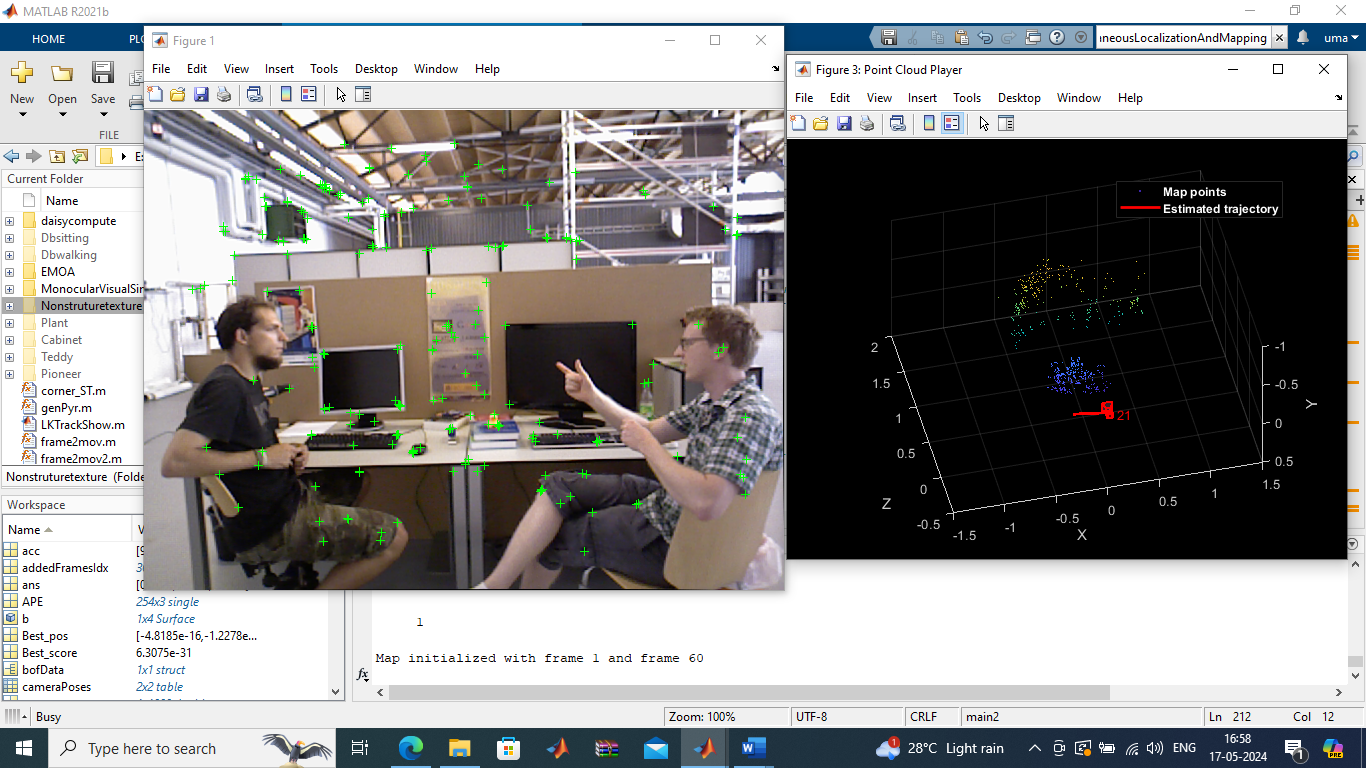


Evaluate tracking accuracy


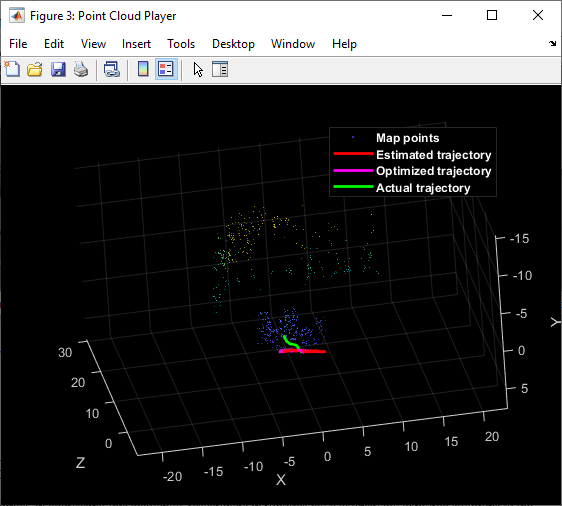


Walking:

**Map from frme 1 to N**


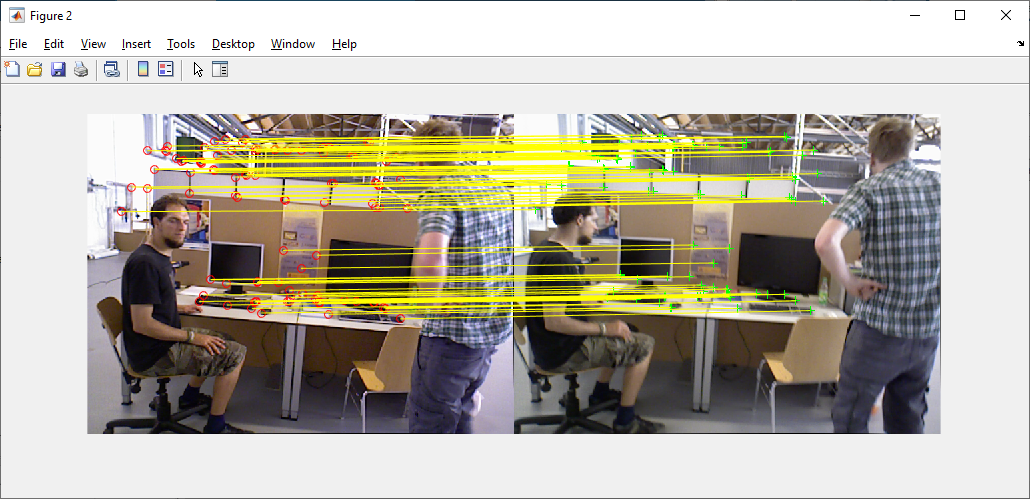


**Initial Key frame Features:**


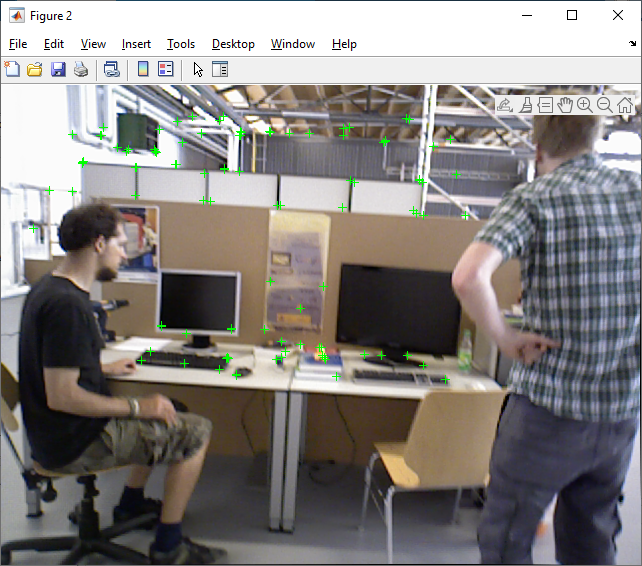


**Initial Key frame Features:**


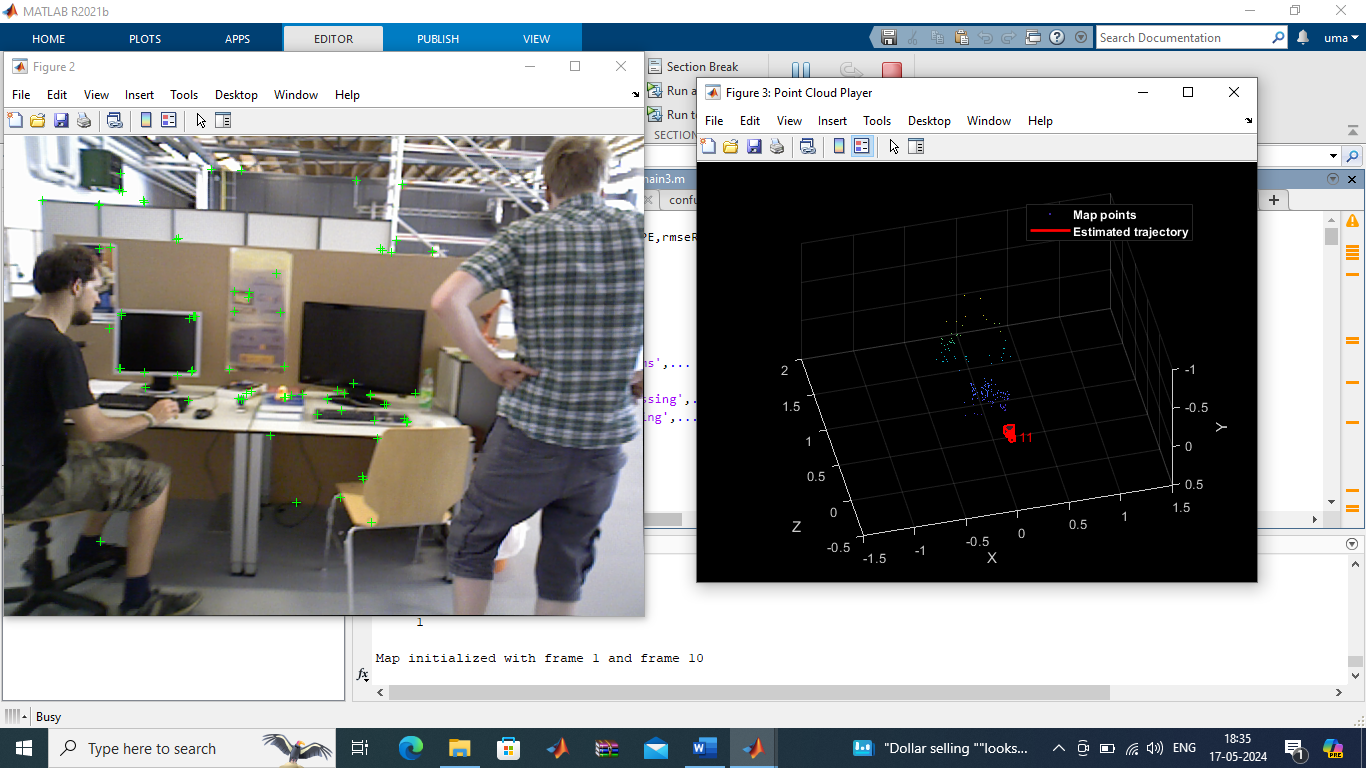


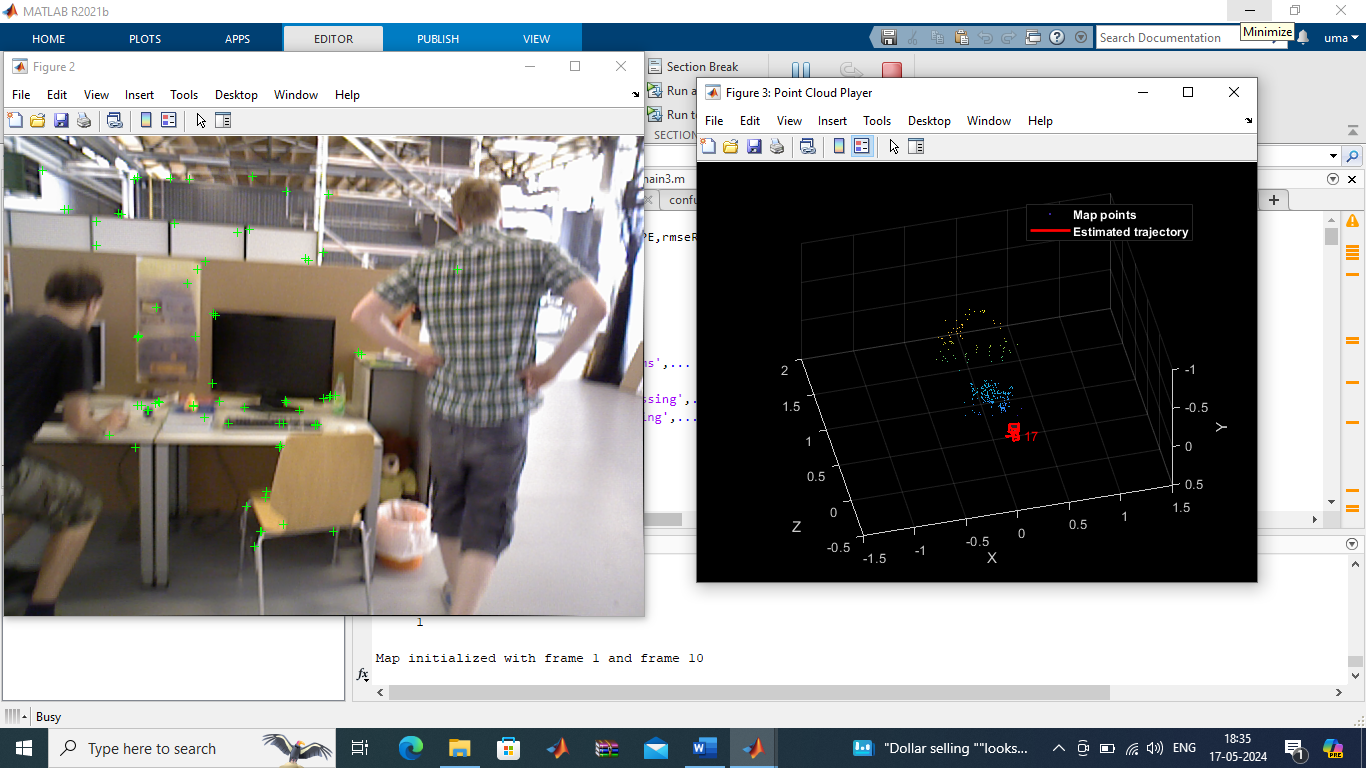


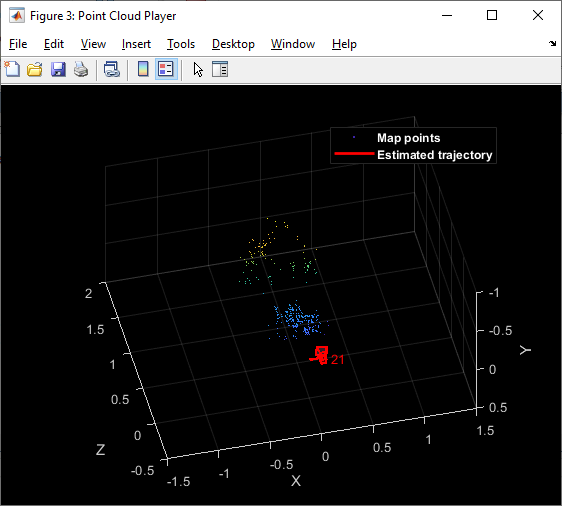


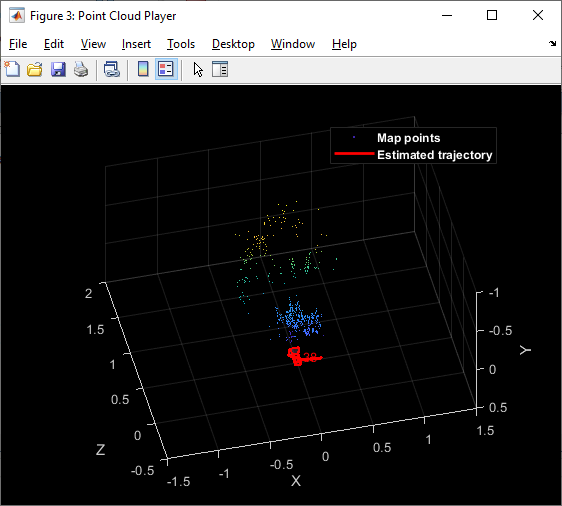


**Evaluate tracking accuracy:**


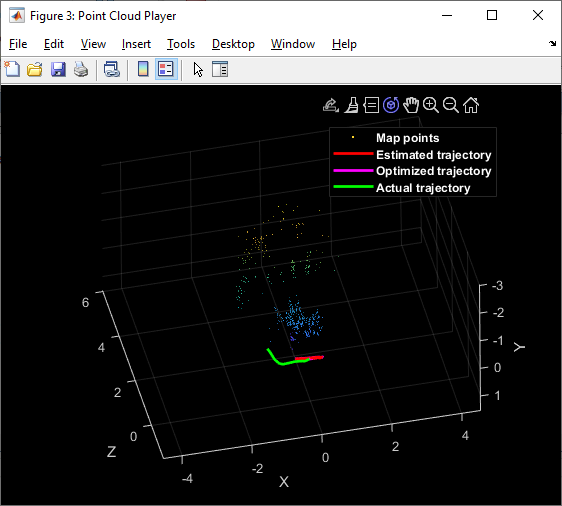


**Teddy:**

**Map from frme 1 to N**


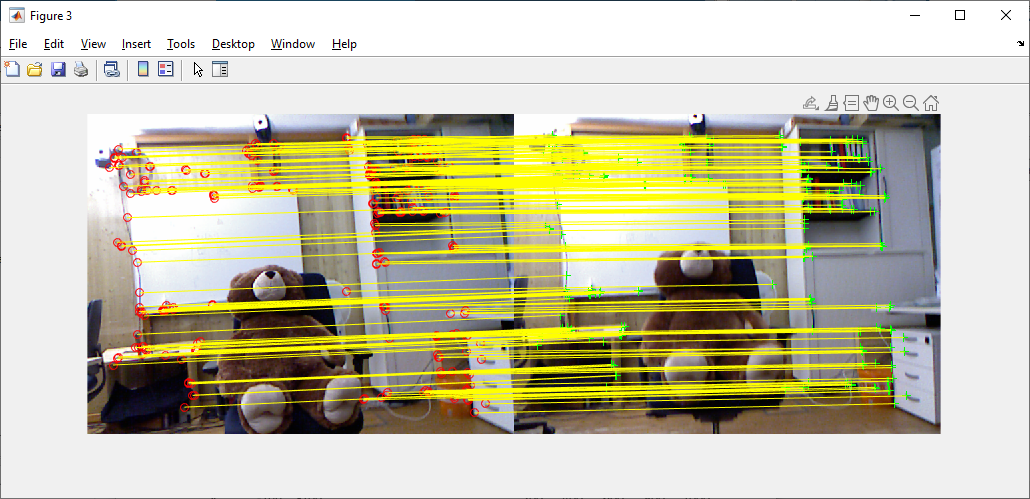


**Initial Key frame Features:**

**Initial Key frame Features:**


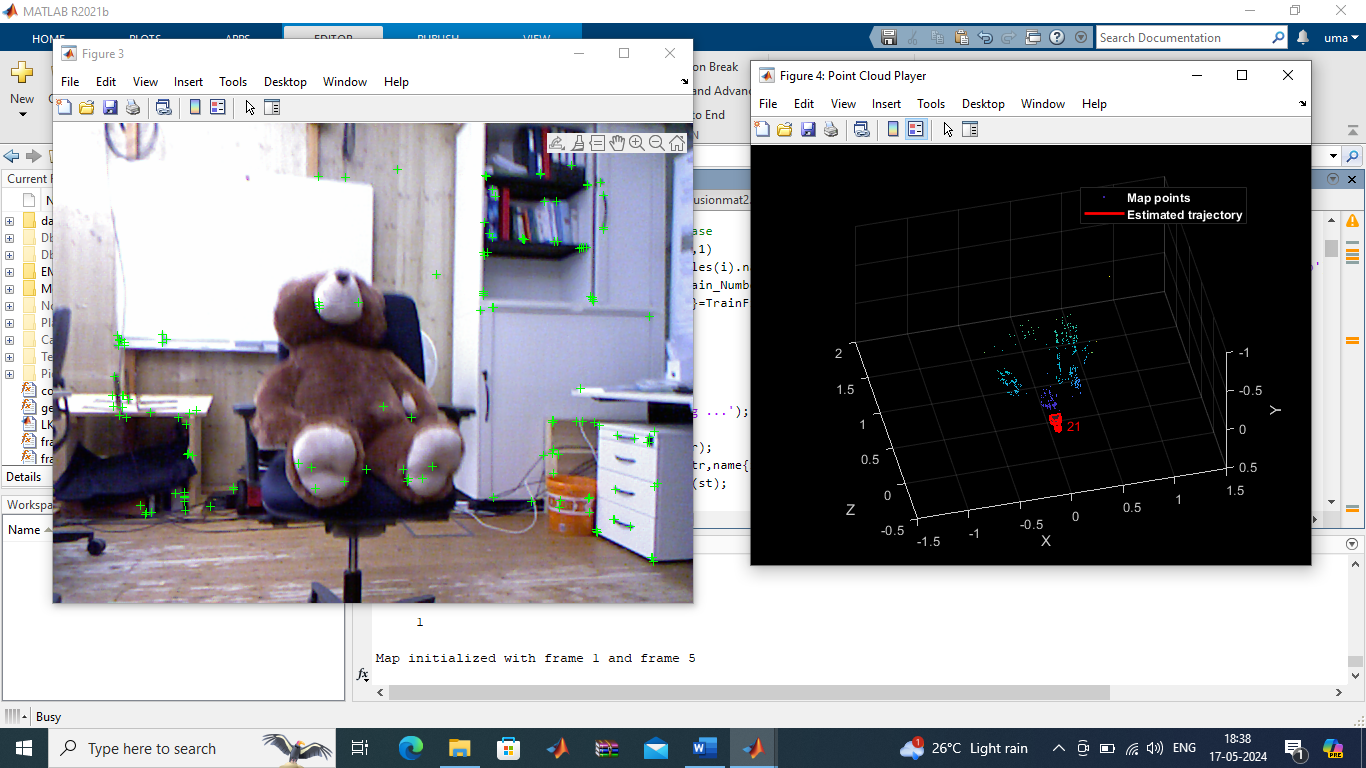


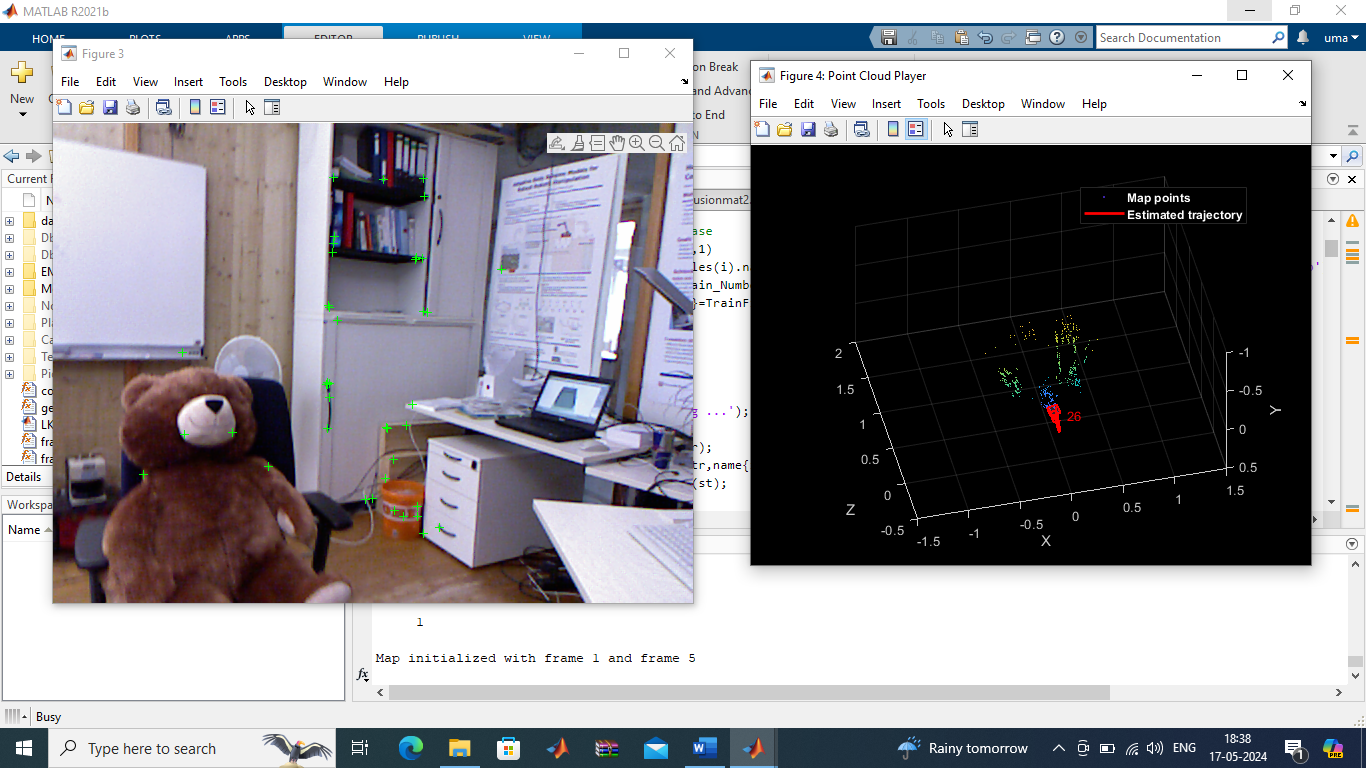


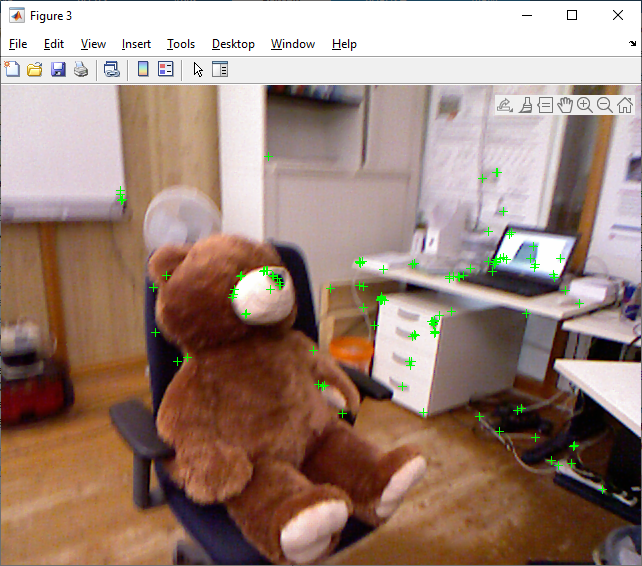


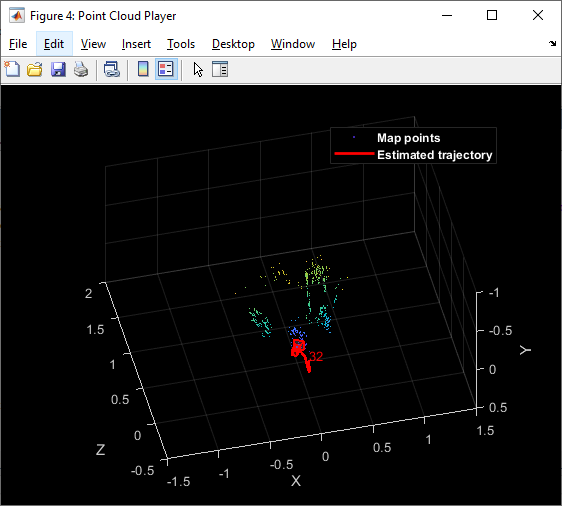


**Evaluate tracking accuracy:**


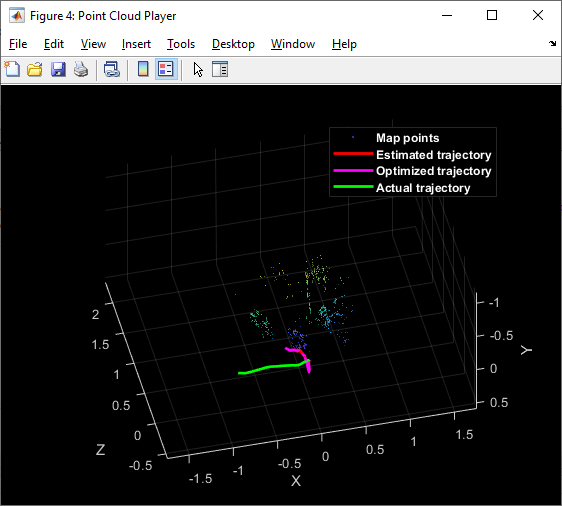


**Cabinet:**

**Map from frme 1 to N**


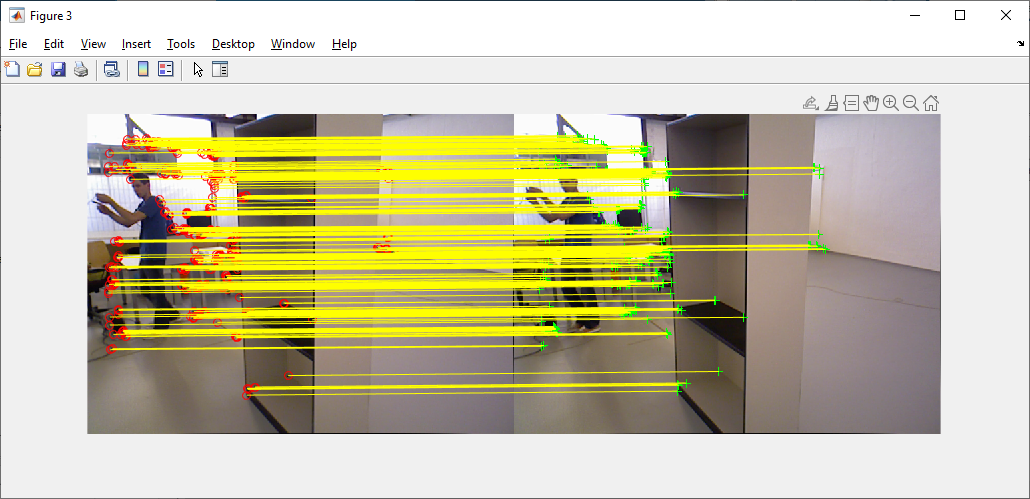


**Initial Key frame Features:**

**Initial Key frame Features:**


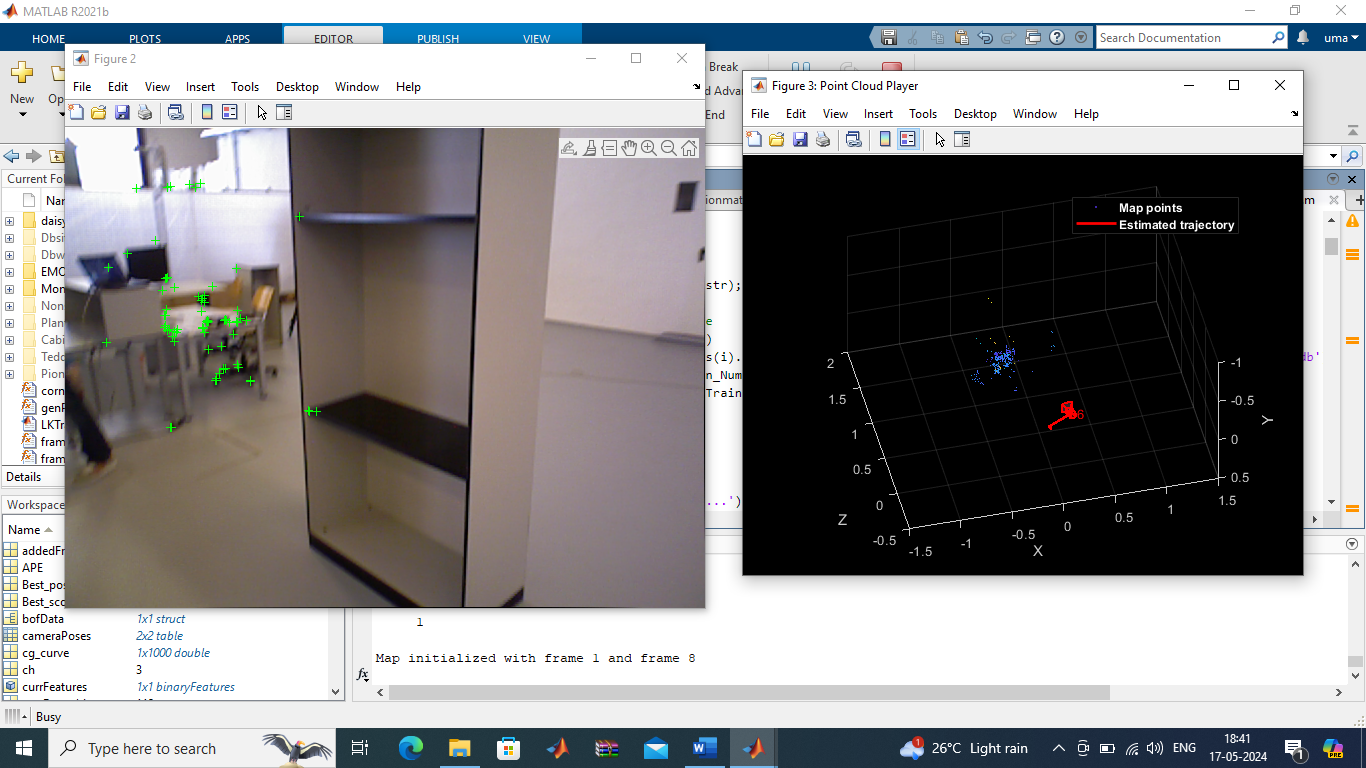


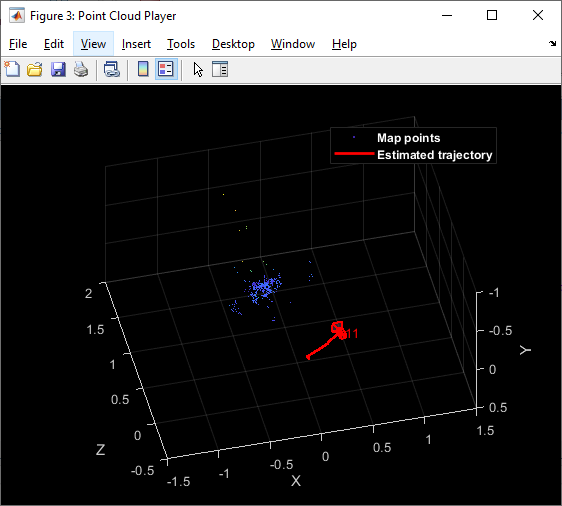


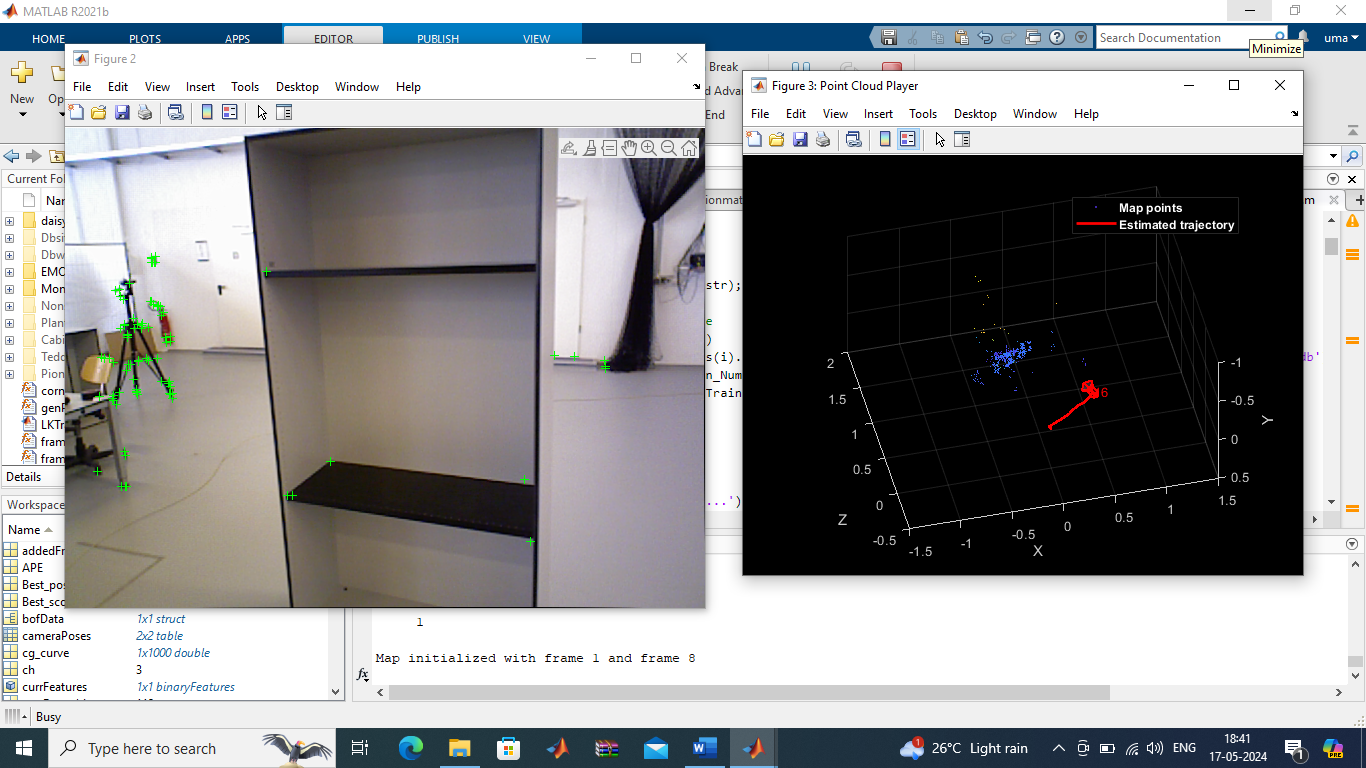


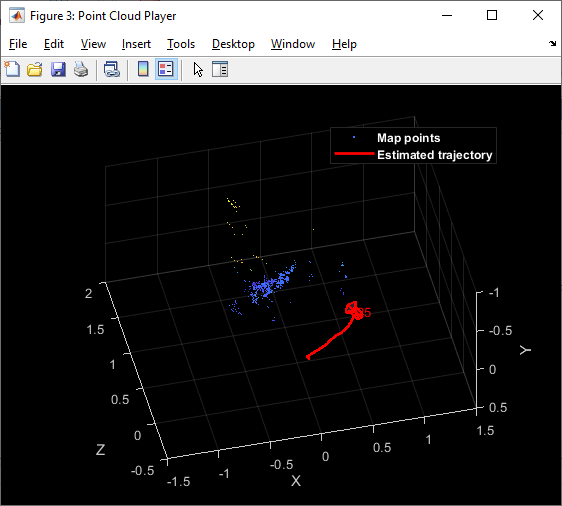


**Evaluate tracking accuracy:**


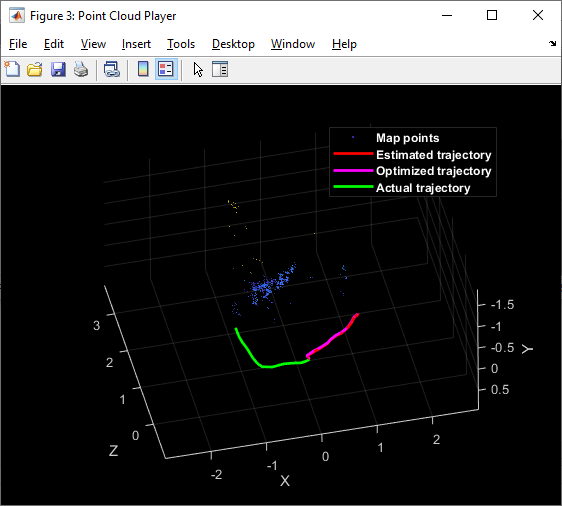

Supplement: Screenson17maywith5datasets.docx [file Screenson17maywith5datasets.docx]
